# Supplementary material
Source: PubMed Central journal article supplement (PMC3839697)
Supplement: 1310439110_pnas.201310439SI.pdf [file 1310439110_pnas.201310439SI.pdf]

# Supporting Information

Li et al. 10.1073/pnas.1310439110

## SI Materials and Methods

**Reagents.** Sodium fluoride, kanamycin, G418, sorbitol, glufosinate ammonium, yeast nitrogen base without amino acids, and yeast synthetic drop-out media supplement without histidine (or leucine) were purchased from Sigma-Aldrich. Bacto Yeast Extract, Bacto Peptone, Bacto Agar, and Difco yeast nitrogen base without amino acids were purchased from BD Biosciences. Glucose (dextrose) was purchased from J. T. Baker. Hygromycin B was purchased from EMD Millipore and Invitrogen.  $^{18}\text{F}$ , in the form of  $\text{Na}^{18}\text{F}$ , was obtained from Cardinal Health.

**Phylogenetic Tree for Eukaryotic FEX Genes.** Eukaryotic FEX protein sequences were downloaded from UniProt (annotated there as CrcB homologs) (1). The program MUSCLE (2) was used to align the sequences and RAxML (3) was used to generate the tree file. A few sequences were excluded from the final alignment because they aligned poorly to the majority of sequences and/or were missing elements common to the rest of the collection (e.g., were not predicted to contain any transmembrane segments). Fewer than 10 sequences were excluded in the final alignment. Mega5 (4) was used to view and generate the figure of the tree.

**Strains and Media.** *Neurospora crassa*. The Fungal Genetics Stock Center was the source of *N. crassa* (FGSC#4200 and FGSC#9717) and the plasmid pCSN44 (5). The deletion of the *fex-1* gene (*NCU06262*) was accomplished following protocols developed by Hildur Colot (6). Briefly, a KO cassette was constructed that contains the upstream portion (about 1.5 kb) of the *NCU0626* ORF, a hygromycin B resistance gene and the downstream fragment (about 1.5 kb) of the *NCU06262* ORF. The 5' flank fragment was amplified from the *N. crassa* (FGSC#9717) genome using primers Ncr-5F and Ncr-5R (Table S4) producing a 1,479-bp fragment before the start codon of *fex-1* (*NCU06262*). The 3' flank fragment was then amplified using 3'F-*ecoRV* and 3'R-*notI* (Table S4). The hygromycin B KO (*hph* KO) cassette, including the TrpC promoter and terminator, was amplified from pCSN44 using *hphF*-*pro* and *hphR*-*ter* (Table S4). The 5' flank fragment and the *hph* KO cassette were ligated by PCR and inserted into a topo-TA vector. This vector was shown to contain the insert in the arrangement of HindIII-5' flank fragment-*hph* KO cassette-*EcoRV*. The plasmid was digested with *EcoRV* and *NotI* to insert the 3' flank fragment. This plasmid now contained the entire *N. crassa fex-1* KO fragment that was then digested out of the plasmid using HindIII and *NotI* to use for electroporation into *N. crassa* strain FGSC#9717.

The macroconidia of the fungus were used for making the gene KO by homologous recombination following standard procedures as previously described (6). Briefly, the *N. crassa* mus KO strain FGSC#9717 (*delta mus-51::bar+*, *his-3 A*) was cultured by incubating at 30 °C for 3 d and then 25 °C for 7–10 d. The conidia were harvested, and the spores were washed twice with water and once with 1 M sorbitol and resuspended in residual sorbitol. The macroconidia were electroporated in the presence of the KO cassette described above. Successful transformants were selected on minimal media (28 °C) supplemented with hygromycin (300 µg/mL) and histidine. The presence of the hygromycin resistance gene was confirmed by PCR. This heterokaryotic KO mutant was crossed with the WT strain (*his+ a*) FGSC#4200. After the perithecia matured, we picked ascospores that grew in minimal media that contained hygromycin (200 µg/mL). We then tested for glufosinate ammonium (200 µg/mL) sensitivity to isolate transformants with WT *mus-51*. PCR was used to confirm that

these transformants contained the hygromycin resistance gene, no *fex-1* ORF, and the whole KO cassette.

Rescue strains were constructed by integrating a WT *fex-1* copy (including original promoter and terminator) into the *his-3* locus in the deletion strain. The WT *NCU06262* fragment (3,164 bp) includes the promoter and terminator (the region between the *NCU06263* and the *NCU06261* genes) and was cloned from the *N. crassa* strain FGSC#9717 genome using primers *EcoRI*-*ncuF* and *EcoRI*-*ncuR* (Table S4). The fragment was inserted into the *EcoRI* site in plasmid p107-2 (7), which contains a truncated *his-3* gene downstream of the insertion. The plasmid was electroporated into the *his-3 fex-1* KO strain, and transformants were selected on minimal media without histidine. PCR was used to confirm that the resulting rescue strain contained a WT copy of the *fex-1* gene.

Microconidia were prepared as previously described (8). Specifically, macrospore suspensions from rescue strains were inoculated to a test tube containing 2% (wt/vol) agar, 0.5% sucrose, 0.1 x synthetic crossing medium, and 1 mM iodoacetic acid (IAA). Cultures were grown at room temperature (25 °C) for 7–10 d. The microconidia were harvested with 2 mL water and were passed through 5-µm millex Durapore filter units. Diluted microspores were plated on Petri plates containing Vogel's and sorbose agar.

Southern blotting was used to determine whether the rescue strain was homokaryotic or heterokaryotic. Briefly, 10 µg of genomic DNA from different strains of *N. crassa* including WT, KO, and rescue were digested with *SacII* and run on a 0.8% agarose gel. The DNA in the gel was depurinated, denatured, and transferred to a piece of positively charged nylon membrane. The probe was prepared by the random priming method and the 2.7-kb *his-3* fragment was used as a template. The Southern blot indicates that the majority of rescue strains purified from microconidia are homokaryotic (Fig. S2). We confirmed that the strain used for growth rate measurements and IC<sub>50</sub> determination is homokaryotic.

**Saccharomyces cerevisiae.** The *FEX* KO strains used in this study were made in the background of the BY4741 and BY4742 strains (obtained as a generous gift from M. Hochstrasser, Yale University, New Haven, CT) (9). To generate the two single deletion strains, the *FEX1* ORF (YOR390W) was replaced with the kanMX6 resistance cassette (10, 11) in BY4741 and the *FEX2* ORF (YPL279C) was replaced with the *hphMX4* resistance cassette (12) in BY4742 using standard PCR-based deletion methods. Primers that contained 45 bp of homology to the region immediately upstream and downstream of the ORF were used to amplify each resistance cassette from the pFA6a-kanMX6 (kanMX6) and pAG32 (*hphMX4*) vectors (Table S3). Yeasts were transformed with these DNAs using the standard lithium acetate procedure (13). Deletion of an ORF was confirmed using PCR. Because *FEX1* and *FEX2* are nearly identical, both the upstream region of the deleted *FEX* gene as well as the coding region of the intact *FEX* gene were sequenced to determine which ORF had been deleted. The single *FEX1*Δ and *FEX2*Δ strains were mated to produce a diploid organism containing both deletions. This diploid strain was then allowed to sporulate and the resulting spores were subjected to tetrad analysis to generate the haploid *FEX1*Δ *FEX2*Δ double deletion strain.

To determine whether the double deletion strain could be rescued, the coding region, along with 700 bp upstream and 600 bp downstream, of *FEX1* was amplified from *FEX2*Δ genomic DNA. This sequence was ligated into pRS416 (obtained from the ATCC) between the *NotI* and *XhoI* restriction sites to create

pRS416-FEX1. The sequence in the vector was verified by sequencing. Yeast was transformed with both pRS416 and pRS416-FEX1 using the standard lithium acetate protocol and transformants were isolated on SC-ura media.

Unless otherwise noted, yeast was grown in YPD media that was not pH adjusted. We measured an average pH of YPD of 6.5. Selection for deletion strains was done using YPD media supplemented with 300  $\mu\text{g}/\text{mL}$  G418 and/or hygromycin B. Selection for strains successfully transformed with vectors containing *URA3* was done using synthetic complete-ura media. For solid plate assays, NaF was added to YPD agar directly before the plates were poured.

**Candida albicans.** The *C. albicans* SN152 strain and plasmids pSN40, pSN52, and pSN69 were obtained as a gift from S. M. Noble (University of California, San Francisco). This strain of *C. albicans* contains one copy of a *FEX* gene (CaO19.7095) but because it is a diploid organism, both heterozygous KO and homozygous KO strains were made by deleting one or both alleles. These KO strains were made following protocols developed by Suzanne Noble (14). Briefly, fusion PCR was performed to create disruption fragments of both alleles of the *FEX1* gene. The two alleles of the *FEX1* gene were knocked out with two different nutrition markers. For each allele, a KO cassette containing either the *Candida maltosa* *LEU2* gene or the *Candida dubliniensis* *HIS1* gene and a flanking sequence of 500 bp upstream and downstream of the *C. albicans* *FEX1* gene (Cao19.7095) was constructed by amplifying partial sequences using PCR. These fragments were then ligated together to form the complete KO cassette. Two sequential rounds of electroporation were performed to produce first the heterozygous and then the homozygous KO. Electroporation was performed following the manufacturer's protocol for GenePulser (Bio-Rad). Specifically, a single colony of SN152 was cultured in 50 mL YPD in a 150 mL flask, incubating at 30 °C, and shaking at 200 rpm overnight (12 h) (VWR standard orbital shaker, VWR Signature Model DS-500; VWR International, West Chester, PA). The cells were chilled on ice and precipitated at 800  $\times g$  for 5 min. The pellet was washed twice with 30 mL ice cold water and once with 20 mL ice cold 1 M sorbitol. The washed cells were resuspended in 100  $\mu\text{L}$  1 M sorbitol. Sixty microliters of the cells and 5  $\mu\text{g}$  of the KO cassette DNA were used for electroporation (1,500 V, 200  $\Omega$ , and 25  $\mu\text{F}$ ) in a 2-mm cuvette. Following transformation, the cells were immediately resuspended in 1 mL ice cold 1 M sorbitol, and 200  $\mu\text{L}$  was plated on leu-dropout agar and incubated at 30 °C. PCR was used to confirm the insertion of the *C. maltosa* *LEU2* gene. This strain is referred to as the heterozygous KO strain. A subsequent round of electroporation to replace the second allele of the *FEX1* gene was accomplished using the *HIS1* gene KO cassette. For this step, all cultures were in leu-dropout and his-dropout media, and the 1 M sorbitol and water were all adjusted to pH 7.0 to prevent fluoride from entering and killing the cells when both alleles of *FEX1* were deleted. PCR was used to confirm the double allele KO.

The rescue strain was constructed by integrating a third nutrition marker and the WT copy of *FEX1* into the RPS10 locus of the homozygous KO *C. albicans* strain. This rescue method was similar to that used in a previous study (15). The rescue fragment contains 1-kb regions just upstream and downstream of the RPS10 gene, the *C. albicans* *FEX1* gene (including 1.2 kb upstream and 1.2 kb downstream of the ORF), and the *C. dubliniensis* ARG4. The

ARG4 fragment was amplified from plasmid pSN69 (14), and the other three fragments were amplified from *C. albicans* genomic DNA. All four fragments were inserted one by one into the Topo-TA vector between the BamHI and Apal sites. This complete rescue fragment was electroporated into the homozygous KO strain using the procedure described above. The transformants growing on arginine drop-out media were picked and tested by PCR to confirm the integration of WT *FEX1* into the genome.

**Growth Assays. *N. crassa.*** Liquid cultures of *N. crassa* were grown in test tubes as previously described (16). Briefly, *N. crassa* was recovered and one loop of spores was resuspended in 2 mL minimal medium (about 2.0 OD<sub>600</sub>). Twenty microliters of this suspension was diluted into 2 mL minimal medium in an autoclaved 16  $\times$  150-mm glass tube with cap. The fungus was allowed to grow for about 4 d at 25 °C.

Solid agar media cultures were grown in race tubes according to previously published methods (17) with small modifications. Specifically, 50-mL sterile disposable plastic pipettes were filled with minimal agar medium [Vogel's, 2% (wt/vol) glucose, and 1.5% (wt/vol) agar]. The media were supplemented with filter-sterilized sodium fluoride. The race tubes were capped with sterile test-tube caps and secured with micropore tape. Tubes were inoculated with 10  $\mu\text{L}$  of spore suspension (OD 1.0) from the top of the tube with long, thin gel-loading tips (remove the filter with forceps before inoculation and reinsert the filter after inoculation). The tubes were kept at room temperature, and the growth front was marked every day for 4 d. Growth rates were measured for all strains. Growth curves were graphed, and IC<sub>50</sub> values were calculated with GraphPad Prism using a nonlinear regression model with a sigmoidal dose-response (variable slope).

***S. cerevisiae.*** Strains were grown overnight in YPD (SC-ura if they were transformed with a plasmid). For solid plate assays, these cultures were diluted to an OD<sub>600</sub> of 0.2. Serial sixfold dilutions were made in sterile water. Cells were spotted onto YPD or YPD + fluoride plates and incubated at 30 °C. For liquid growth assays, cultures were diluted to a final OD<sub>600</sub> of 0.1 in a Costar 24-well flat bottom plate in YPD and NaF. Each well contained a total volume of 1 mL. The assays were performed in a Biotek Synergy four-plate reader at 30 °C with continual shaking. OD<sub>600</sub> measurements were recorded every 3 min. Curves were plotted and analyzed using GraphPad Prism. To determine IC<sub>50</sub> values, the area under the curve was calculated for each growth curve (18). These values were normalized relative to the growth curve for each strain in YPD containing no fluoride. The normalized values were plotted vs. the log of the fluoride concentration and fit to a standard dose-response curve with GraphPad Prism. IC<sub>50</sub> values were also calculated by plotting the OD<sub>600</sub> at a single time point as a function of fluoride concentration. The time point was chosen to be in the linear region of the growth curve. Both of these methods gave very similar IC<sub>50</sub> values. The values reported in Table S1 are from the area under the curve analysis.

***C. albicans.*** Strains were grown overnight in YPD medium at 30 °C with shaking (200 rpm). For growth assays, each culture was diluted to an OD<sub>600</sub> of 0.25, and 8  $\mu\text{L}$  of this suspension was diluted in 400  $\mu\text{L}$  of media in each well of a Honeycomb plate (Oy Growth Curves Ab Ltd.). NaF was supplemented if necessary. The assay was performed for 36 h at 30 °C, measuring OD<sub>600</sub> every 15 min without shaking in a bioscreen C MBR instrument.

1. UniProt Consortium (2012) Reorganizing the protein space at the Universal Protein Resource (UniProt). *Nucleic Acids Res* 40(Database issue):D71–D75.
2. Edgar RC (2004) MUSCLE: Multiple sequence alignment with high accuracy and high throughput. *Nucleic Acids Res* 32(5):1792–1797.
3. Stamatakis A, Hoover P, Rougemont J (2008) A rapid bootstrap algorithm for the RAxML Web servers. *Syst Biol* 57(5):758–771.
4. Tamura K, et al. (2011) MEGA5: Molecular evolutionary genetics analysis using maximum likelihood, evolutionary distance, and maximum parsimony methods. *Mol Biol Evol* 28(10):2731–2739.
5. McCluskey K, Wiest A, Plamann M (2010) The Fungal Genetics Stock Center: A repository for 50 years of fungal genetics research. *J Biosci* 35(1):119–126.
6. Colot HV, et al. (2006) A high-throughput gene knockout procedure for *Neurospora* reveals functions for multiple transcription factors. *Proc Natl Acad Sci USA* 103(27):10352–10357.
7. Cheah MT, Wachter A, Sudarsan N, Breaker RR (2007) Control of alternative RNA splicing and gene expression by eukaryotic riboswitches. *Nature* 447(7143):497–500.
8. Ebbole D, Sachs MS (1990) A rapid and simple method for isolation of *Neurospora crassa* homokaryons using microconidia. *Fungal Genet Newsl* 37:17–18.



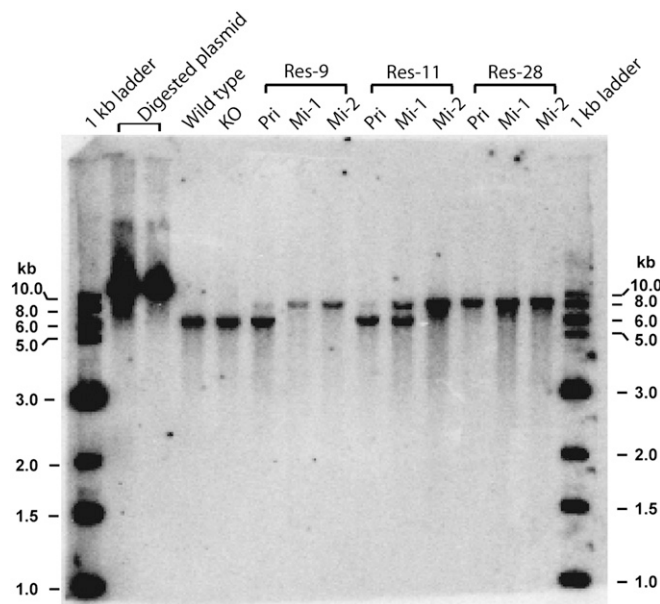

Fig. S2. Southern blot of *N. crassa* rescue strains. Genomic DNAs and the plasmid used for rescue were digested with *Sac*I, separated on a 0.8% agarose gel, and visualized with a labeled DNA probe targeted to the *his3* gene. Res-9, Res-11, and Res-28 are three primary rescue strains from which microconidia strains Mi-1 and Mi-2 are isolated. WT and KO DNAs produced a band around 6 kb. Six rescue strains produced bands around 6 and/or 8 kb. Rescue strains that produce a single band are homokaryotic.

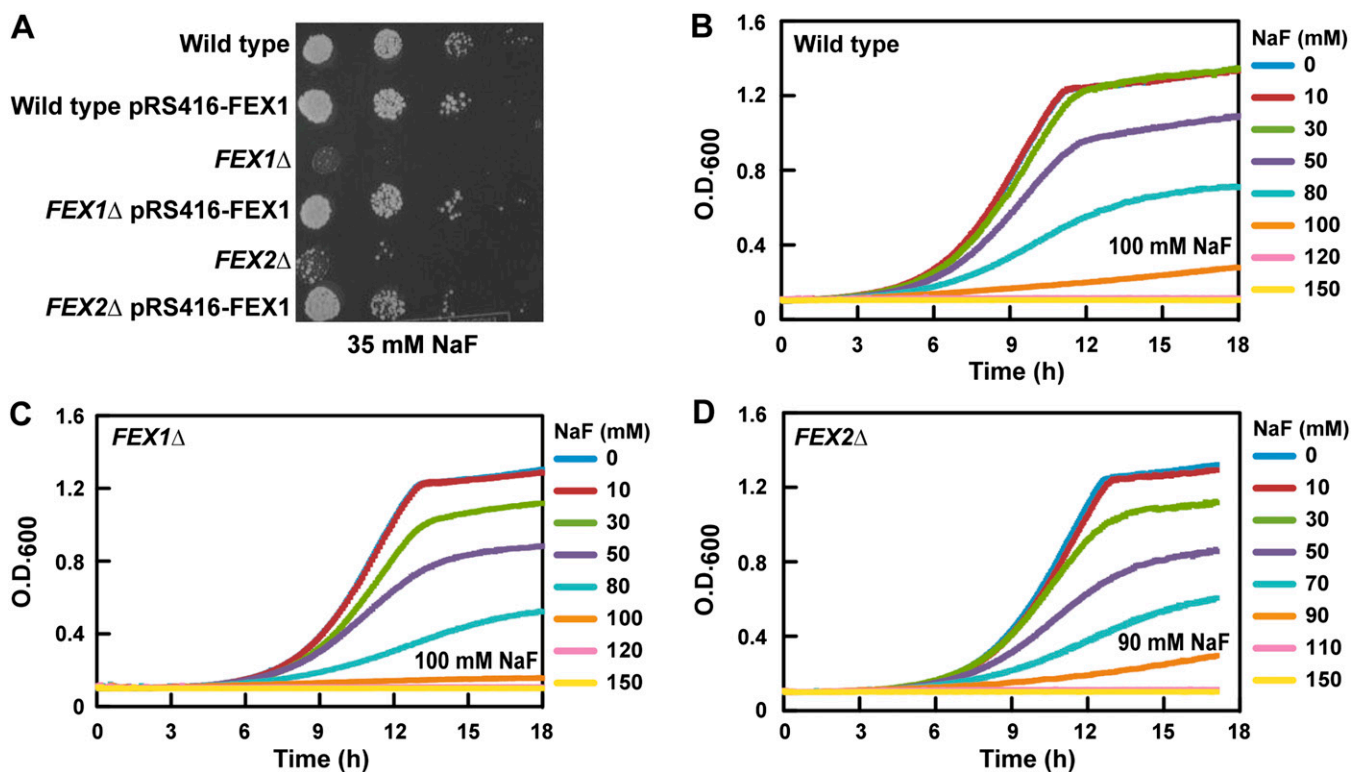

Fig. S3. Fluoride sensitivity of single *FEX* deletion mutants of *S. cerevisiae*. (A) Serial dilution assay. Media is YPD + 35 mM NaF. Image is after 6 d of growth at 30 °C. (B) Growth assay of WT *S. cerevisiae* in liquid YPD with added NaF. Growth was at 30 °C. (C) Growth assay of *FEX1*Δ *S. cerevisiae* in liquid YPD with added NaF. Growth was at 30 °C. (D) Growth assay of *FEX2*Δ *S. cerevisiae* in liquid YPD with added NaF. Growth was at 30 °C.

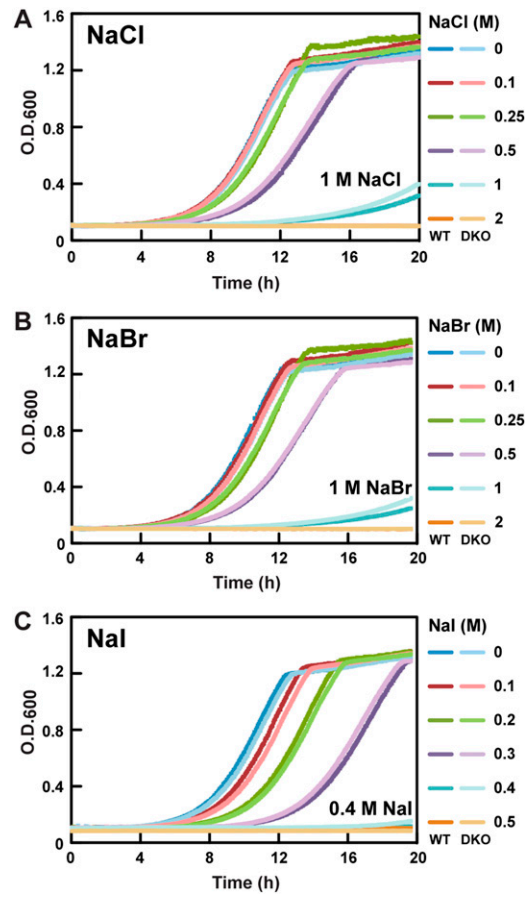

**Fig. 54.** Growth of WT and double KO *S. cerevisiae* with halide salts in liquid media. Growth of the WT is shown in dark colors; growth of the double KO (DKO) is shown in light colors. All assays were at 30 °C. (A) Growth in NaCl. (B) Growth in NaBr. (C) Growth in NaI.

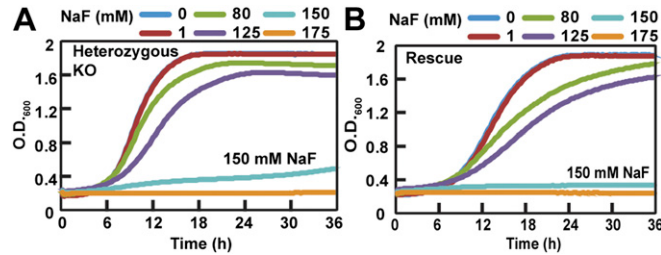

**Fig. 55.** Sensitivity of *C. albicans* strains to NaF. Growth curves of (A) heterozygous KO and (B) rescue strains grown in different concentrations of NaF.



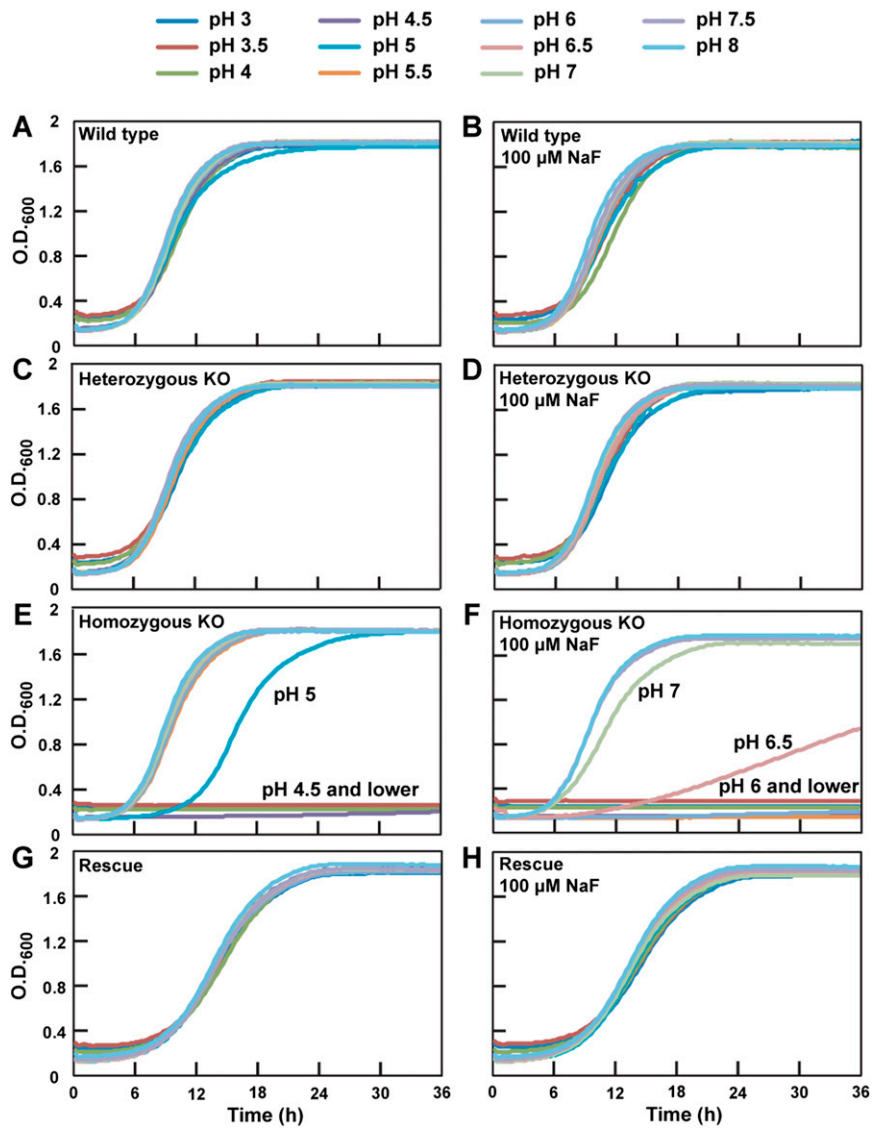

**Fig. 57.** Effect of pH on the growth of *C. albicans*. (A) WT strain. (B) WT with 100 μM NaF. (C) Heterozygous KO strain. (D) Heterozygous KO strain with 100 μM NaF. (E) Homozygous KO strain. (F) Homozygous KO strain with 100 μM NaF. (G) Rescue strain. (H) Rescue strain with 100 μM NaF.

Table S1. MIC and IC<sub>50</sub> values for WT and FEX deletion strains

| Organism                              | <i>S. cerevisiae</i> |        |        |               | <i>C. albicans</i> |         |                 |               | <i>N. crassa</i> |        |            |        |             |        |            |
|---------------------------------------|----------------------|--------|--------|---------------|--------------------|---------|-----------------|---------------|------------------|--------|------------|--------|-------------|--------|------------|
|                                       | WT                   | FEX1Δ  | FEX2Δ  | Double KO     | Rescue             | WT      | Heterozygous KO | Homozygous KO | Rescue           | Liquid | Solid      | Liquid | Solid       | Liquid | Solid      |
| MIC (mM)                              | 120                  | 110    | 110    | 0.120         | 90                 | 175     | 150             | 0.5           | 150              | 80     | ND         | 0.3    | ND          | 80     | ND         |
| IC <sub>50</sub> (mM)                 | 70 ± 1               | 59 ± 2 | 54 ± 5 | 0.060 ± 0.005 | 56 ± 7             | 142 ± 8 | 130 ± 7         | 0.098 ± 0.027 | 137 ± 11         | ND     | 26.3 ± 0.4 | ND     | 0.15 ± 0.01 | ND     | 21.7 ± 0.2 |
| Growth rates<br>(mm·h <sup>-1</sup> ) |                      |        |        |               |                    |         |                 |               |                  | ND     | 3.4 ± 0.2  | ND     | 3.3 ± 0.2   | ND     | 3.1 ± 0.1  |

IC<sub>50</sub> represents the concentration of fluoride that inhibits cell growth by 50%. IC<sub>50</sub> values are the average of at least three independent measurements ± SD. MIC, minimal inhibitory concentration of fluoride; ND, not determined.



**Table S2. Strains used in this study**

| Name                 | Genotype                                                               | Reference  |
|----------------------|------------------------------------------------------------------------|------------|
| <i>S. cerevisiae</i> |                                                                        |            |
| BY4741               | <i>MATa his3Δ1 leu2Δ0 ura3Δ0 lys2Δ0</i>                                | (1)        |
| BY4742               | <i>MATα his3Δ1 leu2Δ0 ura3Δ0 met15Δ0</i>                               | (1)        |
| SSY1                 | <i>MATa his3Δ1 leu2Δ0 ura3Δ0 lys2Δ0 FEX1Δ</i>                          | This study |
| SSY2                 | <i>MATα his3Δ1 leu2Δ0 ura3Δ0 met15Δ0 FEX2Δ</i>                         | This study |
| SSY3                 | <i>MATa his3Δ1 leu2Δ0 ura3Δ0 FEX1Δ FEX2Δ</i>                           | This study |
| SSY4                 | <i>MATα his3Δ1 leu2Δ0 ura3Δ0 FEX1Δ FEX2Δ</i>                           | This study |
| SSY5                 | <i>[FEX1] MATa his3Δ1 leu2Δ0 ura3Δ0 FEX1Δ FEX2Δ</i>                    | This study |
| <i>C. albicans</i>   |                                                                        |            |
| SN152                | Arg <sup>-</sup> Leu <sup>-</sup> His <sup>-</sup>                     | (2)        |
| Single KO            | <i>FEX1</i> first allele deletion (Arg <sup>-</sup> His <sup>-</sup> ) | This study |
| Double KO            | <i>FEX1</i> both alleles deletion (Arg <sup>-</sup> )                  | This study |
| Rescue               | <i>FEX1</i> both alleles deletion/ <i>FEX1</i>                         | This study |
| <i>N. crassa</i>     |                                                                        |            |
| FGSC4200             | Wild-type ( <i>ORS-SL6a</i> )                                          | From FGSC  |
| FGSC9717             | delta <i>mus-51::bar+</i> ; <i>his-3 mat A</i>                         |            |
| <i>fex-1</i> KO      | <i>his-3 fex-1Δ</i>                                                    | This study |
| Rescue               | <i>fex-1Δ+fex-1</i>                                                    | This study |

1. Brachmann CB, et al. (1998) Designer deletion strains derived from *Saccharomyces cerevisiae* S288C: A useful set of strains and plasmids for PCR-mediated gene disruption and other applications. *Yeast* 14(2):115–132.
2. Noble SM, Johnson AD (2005) Strains and strategies for large-scale gene deletion studies of the diploid human fungal pathogen *Candida albicans*. *Eukaryot Cell* 4(2):298–309.

**Table S3. Plasmids used in this study**

| Name                     | Description                                                                          | Reference  |
|--------------------------|--------------------------------------------------------------------------------------|------------|
| For <i>C. albicans</i>   |                                                                                      |            |
| pSN40                    | To amplify <i>C. maltosa LEU2</i>                                                    | (1)        |
| pSN52                    | To amplify <i>C. dubliniensis HIS</i> gene                                           |            |
| pSN69                    | To amplify <i>C. dubliniensis ARG4</i> gene                                          |            |
| For <i>N. crassa</i>     |                                                                                      |            |
| pCSN44                   | To amplify hygromycin resistance gene                                                | (2)        |
| For <i>S. cerevisiae</i> |                                                                                      |            |
| pFA6a-kanMX6             | To amplify the kanMX6 cassette                                                       | (3)        |
| pAG32                    | To amplify the hphMX4 cassette                                                       | (4)        |
| pRS416                   | Empty shuttle vector                                                                 | (5)        |
| pRS416-FEX1              | pRS416 with the <i>FEX1</i> ORF inserted between the NotI and XhoI restriction sites | This study |

1. Noble SM, Johnson AD (2005) Strains and strategies for large-scale gene deletion studies of the diploid human fungal pathogen *Candida albicans*. *Eukaryot Cell* 4(2):298–309.
2. Colot HV, et al. (2006) A high-throughput gene knockout procedure for *Neurospora* reveals functions for multiple transcription factors. *Proc Natl Acad Sci USA* 103(27):10352–10357.
3. Bähler J, et al. (1998) Heterologous modules for efficient and versatile PCR-based gene targeting in *Schizosaccharomyces pombe*. *Yeast* 14(10):943–951.
4. Goldstein AL, McCusker JH (1999) Three new dominant drug resistance cassettes for gene disruption in *Saccharomyces cerevisiae*. *Yeast* 15(14):1541–1553.
5. Brachmann CB, et al. (1998) Designer deletion strains derived from *Saccharomyces cerevisiae* S288C: A useful set of strains and plasmids for PCR-mediated gene disruption and other applications. *Yeast* 14(2):115–132.

**Table S4. Sequences of DNA primers used in this study**

| Name                                         | DNA sequence (5'-3')                                                         | Purpose                                                                                               |
|----------------------------------------------|------------------------------------------------------------------------------|-------------------------------------------------------------------------------------------------------|
| For <i>C. albicans</i> KO                    |                                                                              |                                                                                                       |
| 5'flankF                                     | CTGTGGACGTTCTGATAGTATGTC                                                     | For amplifying 5' flank of <i>C. albicans</i> <i>FEX1</i> KO (overlapping histidine selection marker) |
| 5'flankR-his                                 | GTATGCTTGCCATGGTATCAAACGTATATTGGACT<br>AAAGAATGATAGTAT                       |                                                                                                       |
| CdhisF                                       | GTTTGATACCATGGCAAGCATAAC                                                     | For amplifying histidine selection marker                                                             |
| CdhisR                                       | CTAGAAAACCGTACCAGGTGAAC                                                      |                                                                                                       |
| 3'flankF-his                                 | GTTACCTGGTACGGTTTTCTAGAAATATGTGC<br>TTCGACATACCCAG                           | For amplifying 3' flank of <i>C. albicans</i> <i>FEX1</i> KO (overlapping histidine selection marker) |
| 3'flankR                                     | GGATTATAGTAATTCCAAGTGTGCAG                                                   |                                                                                                       |
| 5'flankR-leu                                 | CCACCAGTGATGATTGGATCCGTATATTGGACT<br>AAAGAATGATAGTAT                         | For amplifying 5' flank of <i>C. albicans</i> <i>FEX1</i> KO (overlapping leucine selection marker)   |
| CmleuF                                       | GGATCCAATCATCACTGGTGG                                                        |                                                                                                       |
| CmleuR                                       | ACCTACCCATGTCTAGAAAG                                                         | For amplifying leucine selection marker                                                               |
| 3'flankF-leu                                 | CTTTCTAGACATGGGTAGGTAATATG<br>TGCTTCGACATACCCAG                              |                                                                                                       |
| CrcupcheckF                                  | CATTCCTGTGCGTGTAGAAGTC                                                       | For confirming gene replacement                                                                       |
| CrcdowncheckR                                | GGATGGGCAGCAAGTTTCTC                                                         |                                                                                                       |
| For <i>C. albicans</i> <i>FEX1</i> KO rescue |                                                                              |                                                                                                       |
| RPS10-5F-BamHI                               | GATCGGATCCCCACGTTAACAATTTTCATCAAG                                            | For amplifying 5' flank of RPS10 for rescue                                                           |
| RPS10-5R-notI                                | TAATGCGGCCGCGCCATGTTGTAAGTTGGTG                                              |                                                                                                       |
| Cal-crcBres-F-notI                           | TAATGCGGCCGCGCTGCCACTTTATCAACTTCCACATG                                       | For amplifying <i>C. albicans</i> <i>FEX1</i>                                                         |
| Cal-crcBres-R-xhoI                           | TAATCTCGAGGTTGGCTCATAACATAAGGCTGG                                            |                                                                                                       |
| CdArgF-xhoI                                  | TAATCTCGAGAAGAACAATTTCTGTACCACAAATG                                          | For amplifying arginine selection marker                                                              |
| CdArgR-xbaI                                  | CATGTCTAGAACAAAAGCTATTTGCATCGTTTG                                            |                                                                                                       |
| RPS10-3F-xbaI                                | CATGTCTAGAGGATAATGATAACTGAAGAGAAG                                            | For amplifying 3' flank of RPS10 for rescue                                                           |
| RPS10-3R-apal                                | TAATGGGCCCTCGACTATTACTCATTGATAAAGAC                                          |                                                                                                       |
| Calcrc-res-check1F                           | GCGTATTATGTCTAGTTATGTAATAAATAGC                                              | Rescue strains checking primers                                                                       |
| Calcrc-res-check2R                           | GGTATGCAACTACCACAGACG                                                        |                                                                                                       |
| Calcrc-res-check3F                           | CGAAGGTCACACTGACTTATGTC                                                      |                                                                                                       |
| Calcrc-res-check4R                           | GTTCTTCTTTGTTCTCAGACTATG                                                     |                                                                                                       |
| For <i>S. cerevisiae</i> KO                  |                                                                              |                                                                                                       |
| Kan-F                                        | GAATCTGCAGTTATTTAATTATTTAATCGAGCGTGT<br>AATGCTCTG-CGGATCCCCGGGTTAATTAA       | For amplifying the KanMX6 cassette                                                                    |
| Kan-R                                        | AAAAAAGTGGGATGATTATGCAGGG<br>AAAAGTATAAAGAAAAGATC-GAA<br>TTCGAGCTCGTTAAAC    |                                                                                                       |
| Hph-F                                        | GAATCTGCAGTTATTTAATTATTTAA<br>TCGAGCGTGTAATGCTCTG-GCATA<br>GGCCACTAGTGGATCTG | For amplifying the HphMX4 cassette                                                                    |
| Hph-R                                        | AAAAAAGTGGGATGATTGTGCAGGAAAAGGTA<br>TGAAGAAAAGATC-CAGCTGAAGCTTCGTACGC        |                                                                                                       |
| For <i>S. cerevisiae</i> rescue              |                                                                              |                                                                                                       |
| 416-F                                        | TCCGTAATCCT-GCGGCCG-CATATACA<br>TATCAGATATCTGTTGAG                           | For amplifying the YOR390W ( <i>FEX1</i> ) ORF for insertion into pRS416                              |
| 416-R                                        | ATCGTTTACGATCTCGAGGAAATAAATA<br>TGAATTATATTAATGAAGTAAAAG                     |                                                                                                       |
| For <i>N. crassa</i> KO                      |                                                                              |                                                                                                       |
| Ncr-5F                                       | GTAACGCCAGGTTTTCCAGTCACGACG<br>CAGGAGTCGGTAGCAGGAAG                          | For amplifying 5' flank of <i>N. crassa</i> <i>fex-1</i> KO                                           |
| Ncr-5R                                       | GTCCTTCAATATCATCTTCTGTCTCCGACC<br>ACTAATCCTAACAATACCGATATGG                  |                                                                                                       |
| HphF-pro                                     | GTCGGAGACAGAAGATGATATTGAAGGAGC                                               | For amplifying hygromycin resistance gene including TrpC promoter and terminator                      |
| HphR-ter                                     | GTTGGAGATCCTCTAGAAAGAAGGATTAC                                                |                                                                                                       |
| Ncr-3F-ecoRV                                 | ATCGGATATCGTGGCAGGTGCAATGGTAG                                                | For amplifying 3' flank of <i>N. crassa</i> <i>fex-1</i> KO                                           |
| Ncr-3R-notI                                  | GACTGCGGCCGCTCTCACAGTATCTCGACTC                                              |                                                                                                       |
| For <i>N. crassa</i> rescue                  |                                                                              |                                                                                                       |
| EcoRI-ncuF                                   | GATCGAATTCGATGAGCAGTCTGTGTTGG                                                | To amplify <i>N. crassa</i> <i>fex-1</i> gene for rescuing                                            |
| EcoRI-ncuR                                   | CATGGAATTCGAAAAGGCTTGAAGAAGAGAGAG                                            |                                                                                                       |
